# Supplementary material
Source: MDPI journal article supplement (https://www.mdpi.com/1999-4907/8/6/220)
Supplement: s1 [file s1]

Table S 1 Supplementary Table1. Mean and standard deviation of the priors used to sample parameters used for the optimization

|  | DEHai | | ITCol | | FIHyy | | ITRen | | FRPue | | ITCpz | |
| --- | --- | --- | --- | --- | --- | --- | --- | --- | --- | --- | --- | --- |
|  | Mean | SD | Mean | SD | Mean | SD | Mean | SD | Mean | SD | Mean | SD |
| ALPHA | 0.055 | 0.0035 | 0.055 | 0.0035 | 0.068 | 0.0035 | 0.068 | 0.0035 | 0.044 | 0.0183 | 0.044 | 0.0183 |
| K | 0.71 | 0.084 | 0.71 | 0.084 | 0.55 | 0.0608 | 0.55 | 0.0608 | 0.65 | 0.0351 | 0.65 | 0.0351 |
| ALBEDO | 0.1 | 0.05 | 0.1 | 0.05 | 0.095 | 0.0177 | 0.095 | 0.0177 | 0.12 | 0.02 | 0.12 | 0.02 |
| MAXINTCPTN | 0.33 | 0.6 | 0.33 | 0.6 | 0.15 | 0.07 | 0.15 | 0.07 | 0.25 | 0.0404 | 0.25 | 0.0404 |
| SLA | 480 | 108.5504 | 480 | 108.5504 | 94 | 25.8666 | 94 | 25.8666 | 66.2 | 11.1723 | 66.2 | 11.1723 |
| SLA_RATIO | 2 | 0.2121 | 2 | 0.2121 | 2 | 0.2828 | 2 | 0.2828 | 2 | 0.01 | 2 | 0.01 |
| FRACBB0 | 0.4 | 0.01 | 0.4 | 0.01 | 0.3 | 0.2425 | 0.3 | 0.2425 | 0.3 | 0.01 | 0.3 | 0.01 |
| FRACBB1 | 0.125 | 0.05 | 0.125 | 0.05 | 0.1 | 0.2635 | 0.1 | 0.2635 | 0.25 | 0.01 | 0.25 | 0.01 |
| TBB | 20 | 0.2 | 20 | 0.2 | 10 | 0.0608 | 10 | 0.0608 | 20 | 0.01 | 20 | 0.01 |
| RHOMIN | 0.64 | 0.0566 | 0.64 | 0.0566 | 0.43 | 0.0608 | 0.43 | 0.0608 | 0.4 | 0.2884 | 0.4 | 0.2884 |
| RHOMAX | 0.64 | 0.1061 | 0.64 | 0.1061 | 0.43 | 0.0608 | 0.43 | 0.0608 | 0.72 | 0.01 | 0.72 | 0.01 |
| TRHO | 4 | 0.0035 | 4 | 0.0035 | 4 | 0.0608 | 4 | 0.0608 | 4 | 0.01 | 4 | 0.01 |
| COEFFCOND | 0.06 | 0.0035 | 0.06 | 0.0035 | 0.06 | 0.0608 | 0.06 | 0.0608 | 0.05 | 0.005 | 0.05 | 0.005 |
| BLCOND | 0.01 | 0.1344 | 0.01 | 0.1344 | 0.02 | 0.0608 | 0.02 | 0.0608 | 0.01 | 0.01 | 0.01 | 0.01 |
| MAXCOND | 0.02 | 0.1273 | 0.02 | 0.1273 | 0.02 | 0.0608 | 0.02 | 0.0608 | 0.0025 | 0.0026 | 0.0025 | 0.0026 |
| MAXAGE | 200 | 30 | 200 | 30 | 200 | 20 | 200 | 20 | 120 | 15.2753 | 120 | 15.2753 |
| RAGE | 0.75 | 0.0035 | 0.75 | 0.0035 | 0.95 | 0.4 | 0.95 | 0.4 | 0.75 | 0.0183 | 0.75 | 0.0183 |
| NAGE | 10 | 0.1 | 10 | 0.1 | 4 | 0.0608 | 4 | 0.0608 | 4 | 0.0183 | 4 | 0.0183 |
| GROWTHTMIN | 0.001 | 3.5355 | 0.001 | 3.5355 | 0.001 | 1.5 | 0.001 | 1.5 | 1 | 0.5774 | 1 | 0.5774 |
| GROWTHTMAX | 40 | 2 | 40 | 2 | 35 | 2 | 35 | 2 | 39 | 0.5774 | 39 | 0.5774 |
| GROWTHTOPT | 19.4 | 0.4243 | 19.4 | 0.4243 | 17.5 | 2.5 | 17.5 | 2.5 | 23 | 1.7321 | 23 | 1.7321 |
| GROWTHSTART | 480 | 200 | 480 | 200 | 400 | 200 | 400 | 200 | 450 | 10 | 450 | 10 |
| MINDAYLENGTH | 12 | 0.495 | 12 | 0.495 | 12 | 1 | 12 | 1 | 12 | 0.3 | 12 | 0.3 |
| OMEGA_CTEM | 0.8 | 0.2 | 0.8 | 0.2 | 0.5 | 0.2 | 0.5 | 0.2 | 0.8 | 0.0183 | 0.8 | 0.0183 |
| RES0CTEM | 0.22 | 0.0035 | 0.22 | 0.0035 | 0.22 | 0.0608 | 0.22 | 0.0608 | 0.22 | 0.0183 | 0.22 | 0.0183 |
| EPSILON_CTEM | 40 | 3.5 | 40 | 3.5 | 5.49 | 2 | 5.49 | 2 | 40 | 0.0183 | 40 | 0.0183 |
| KAPPA | 1.6 | 0.3 | 1.6 | 0.3 | 1.6 | 0.5 | 1.6 | 0.5 | 1.6 | 0.0183 | 1.6 | 0.0183 |
| MIN_R0CTEM | 0.1 | 0.05 | 0.1 | 0.05 | 0.1 | 0.0608 | 0.1 | 0.0608 | 0.1 | 0.0183 | 0.1 | 0.0183 |
| MAX_S0CTEM | 0.55 | 0.05 | 0.55 | 0.05 | 0.55 | 0.1 | 0.55 | 0.1 | 0.55 | 0.0183 | 0.55 | 0.0183 |
| CN_LEAVES | 18.6 | 0.8206 | 18.6 | 0.8206 | 58.8 | 15.3728 | 58.8 | 15.3728 | 42 | 1.3317 | 42 | 1.3317 |
| CN_LITTER | 49 | 7.7782 | 49 | 7.7782 | 116 | 32.8506 | 116 | 32.8506 | 49 | 0.5774 | 49 | 0.5774 |
| CN_FINE_ROOTS | 48.2 | 29.162 | 48.2 | 29.162 | 46.7 | 10.5276 | 46.7 | 10.5276 | 42 | 11.3137 | 42 | 11.3137 |
| CN_LIVE_WOODS | 112 | 20.0035 | 112 | 20.0035 | 50 | 10 | 50 | 10 | 42 | 5.6569 | 42 | 5.6569 |
| CN_DEAD_WOODS | 375 | 188.7864 | 375 | 188.7864 | 535 | 200 | 535 | 200 | 300 | 76.3763 | 300 | 76.3763 |
| LEAVES_FINERTTOVER | 1 | 0 | 1 | 0 | 0.195 | 0.151 | 0.195 | 0.151 | 0.9 | 0.5198 | 0.9 | 0.5198 |
| DBHDCMAX | 0.18 | 0.3 | 0.18 | 0.3 | 0.18 | 0.0801 | 0.18 | 0.0801 | 0.24 | 0.05 | 0.24 | 0.05 |
| DBHDCMIN | 0.14 | 0.06 | 0.14 | 0.06 | 0.14 | 0.0944 | 0.14 | 0.0944 | 0.18 | 0.05 | 0.18 | 0.05 |
| SAP_A | 0.674 | 0.2 | 0.674 | 0.2 | 3.119 | 2.1453 | 3.119 | 2.1453 | 0.674 | 0.05 | 0.674 | 0.05 |
| SAP_B | 1.992 | 0.5 | 1.992 | 0.5 | 1.4544 | 0.1624 | 1.4544 | 0.1624 | 1.992 | 0.1 | 1.992 | 0.1 |
| HMAX | 35 | 8.5049 | 35 | 8.5049 | 56 | 15 | 56 | 15 | 30 | 5 | 30 | 5 |
| DMAX | 100 | 20 | 100 | 20 | 155 | 20 | 155 | 20 | 100 | 20 | 100 | 20 |
| CRA | 34.597 | 2 | 34.597 | 2 | 56 | 10 | 56 | 10 | 34.597 | 0.5 | 34.597 | 0.5 |
| CRB | 0.038 | 0.01 | 0.038 | 0.01 | 0.0658 | 0.03 | 0.0658 | 0.03 | 0.038 | 0.005 | 0.038 | 0.005 |
| CRC | 1.104 | 0.2 | 1.104 | 0.2 | 5.5289 | 0.8 | 5.5289 | 0.8 | 1.104 | 0.05 | 1.104 | 0.05 |
| MINPAREST | 4.05 | 1.2 | 4.05 | 1.2 | 4.05 | 2 | 4.05 | 2 | 4.05 | 0.0183 | 4.05 | 0.0183 |

Table S 2 Supplementary Table2. Values of the parameters used for the 6 simulations, produced by the oprimization scheme.

|  | DEHai | ITCol | FIHyy | ITRen | ITCpz | FRPue |
| --- | --- | --- | --- | --- | --- | --- |
| LIGHT_TOL | 2 | 2 | 3 | 2 | 2 | 2 |
| PHENOLOGY | 0.1 | 0.1 | 1.2 | 1.2 | 1.1 | 1.1 |
| ALPHA | 0.05 | 0.06 | 0.07 | 0.07 | 0.07 | 0.05 |
| EPSILONgCMJ | -9999 | -9999 | -9999 | -9999 | -9999 | -9999 |
| K | 0.64 | 0.61 | 0.53 | 0.47 | 0.61 | 0.66 |
| ALBEDO | 0.23 | 0.22 | 0.08 | 0.09 | 0.12 | 0.15 |
| GAMMA_LIGHT | 0.01 | 0.01 | -9999 | 0.03 | -9999 | -9999 |
| LAIGCX | 8 | 8 | 3.33 | 3.33 | 3.3 | 3.3 |
| LAIMAXINTCPTN | 5 | 5 | 5 | 5 | 5.8 | 5.8 |
| MAXINTCPTN | 1.04 | 1.15 | 0.12 | 0.08 | 0.29 | 0.27 |
| SLA | 101.18 | 61.67 | 85.83 | 101.41 | 73 | 79.01 |
| SLA_RATIO | 2.27 | 2.51 | 2.15 | 1.86 | 2.16 | 2 |
| FRACBB0 | 0.41 | 0.39 | 0.12 | 0.12 | 0.24 | 0.28 |
| FRACBB1 | 0.06 | 0.18 | 0.26 | 0.49 | 0.28 | 0.26 |
| TBB | 20.29 | 19.89 | 10.07 | 9.99 | 17.67 | 20.01 |
| RHOMIN | 0.67 | 0.53 | 0.51 | 0.42 | 0.55 | 0.37 |
| RHOMAX | 0.66 | 0.64 | 0.44 | 0.39 | 0.6 | 0.73 |
| TRHO | 4.02 | 4 | 3.97 | 3.98 | 3.21 | 3.99 |
| COEFFCOND | 0.07 | 0.06 | 0.09 | 0.1 | 0.05 | 0.06 |
| BLCOND | 0.09 | 0.18 | 0.02 | 0.01 | 0.02 | 0.02 |
| MAXCOND | 0.54 | 0.06 | 0.1 | 0.05 | 0 | 0.01 |
| MAXAGE | 191.23 | 204.78 | 196.01 | 181.22 | 106.92 | 106.62 |
| RAGE | 0.78 | 0.75 | 1.14 | 1.31 | 0.75 | 0.74 |
| NAGE | 10.05 | 9.89 | 3.92 | 4.03 | 4.35 | 4.02 |
| MAXAGE_S | 200 | 200 | 100 | -9999 | 0 | 0 |
| RAGE_S | 0.85 | 0.85 | 0.75 | 0.75 | 0 | 0 |
| NAGE_S | 3 | 3 | 4 | 4 | 0 | 0 |
| GROWTHTMIN | 1.13 | 1.06 | 0.57 | 0.3 | 0.8 | 1.19 |
| GROWTHTMAX | 37.55 | 37.82 | 37.91 | 37.77 | 41.55 | 39.45 |
| GROWTHTOPT | 19.36 | 19.61 | 18.27 | 15.48 | 28.71 | 18.5 |
| GROWTHSTART | 526.71 | 117.2 | 206.33 | 201.63 | 147.93 | 442.48 |
| GROWTHEND | 5 | 5 | 0 | 0 | 0 | 0 |
| MINDAYLENGTH | 25.05 | 14.11 | 12.39 | 10.97 | 15.95 | 12.3 |
| SWPOPEN | -0.6 | -0.6 | -0.5 | -0.5 | -0.6 | -0.6 |
| SWPCLOSE | -2.3 | -2.3 | -2.2 | -2.2 | -3.2 | -3.2 |
| SWCONST | 1 | 1 | 1 | 1 | 0.4 | 0.4 |
| SWPOWER | 5 | 5 | 5 | 5 | 3 | 3 |
| OMEGA_CTEM | 0.89 | 0.64 | 0.48 | 0.64 | 0.61 | 0.8 |
| S0CTEM | 0.1 | 0.1 | 0.05 | 0.05 | 0.1 | 0.1 |
| R0CTEM | 0.55 | 0.55 | 0.89 | 0.89 | 0.55 | 0.55 |
| F0CTEM | 0.35 | 0.35 | 0.06 | 0.06 | 0.35 | 0.35 |
| RES0CTEM | 0.25 | 0.22 | 0.24 | 0.17 | 0.2 | 0.24 |
| EPSILON_CTEM | 36.73 | 35.05 | 4.93 | 5.39 | 39.87 | 39.99 |
| KAPPA | 1.22 | 1.37 | 2.05 | 1.08 | 1.56 | 1.6 |
| MIN_R0CTEM | 0.1 | 0.17 | 0.08 | 0.09 | 0.09 | 0.12 |
| MAX_S0CTEM | 0.49 | 0.55 | 0.66 | 0.68 | 0.5 | 0.57 |
| YEARS_FOR_CONVERSION | 30 | 30 | 30 | 30 | 0 | 0 |
| FRUIT_PERC | -9999 | -9999 | -9999 | -9999 | -9999 | -9999 |
| CONES_LIFE_SPAN | -9999 | -9999 | 3 | 3 | -9999 | -9999 |
| FINE_ROOT_LEAF | 0.71 | 0.71 | 0.71 | 0.71 | 1 | 1 |
| STEM_LEAF | 1 | 1 | 2.12 | 3.42 | 1 | 2.2 |
| COARSE_ROOT_STEM | 0.36 | 0.36 | 0.29 | 0.23 | 0.3 | 0.22 |
| LIVE_TOTAL_WOOD | 0.15 | 0.15 | 0.05 | 0.07 | 0.05 | 0.16 |
| CN_LEAVES | 29.18 | 17.02 | 65.15 | 55.9 | 50.65 | 43.74 |
| CN_LITTER | 39.42 | 57.45 | 134.32 | 89.56 | 52.16 | 49.04 |
| CN_FINE_ROOTS | 64.47 | 74.67 | 66.12 | 75.36 | 61.83 | 61.93 |
| CN_LIVE_WOODS | 70.01 | 42 | 46.28 | 47.78 | 49.16 | 51.54 |
| CN_DEAD_WOODS | 214.97 | 436.78 | 649.59 | 402.95 | 194.73 | 400.17 |
| BUD_BURST | 10 | 10 | -9999 | -9999 | -9999 | -9999 |
| LEAF_FALL_FRAC_GROWING | 28.38 | 28.38 | 0 | 0 | 0.2 | 0.2 |
| LEAF_LIFE_SPAN | 1 | 1 | 0.33 | 0.2 | 0.5 | 0.5 |
| LEAVES_FINERTTOVER | 1.03 | 1 | 0.1 | 0.24 | 0.57 | 0.19 |
| COARSERTTOVER | 0.02 | 0.02 | 0.02 | 0.02 | 0.02 | 0.02 |
| SAPWOODTTOVER | 0.01 | 0.01 | 0.03 | 0.03 | 0.01 | 0.01 |
| BRANCHTTOVER | 0.03 | 0.03 | 0.01 | 0.01 | 0.03 | 0.03 |
| LIVE_WOOD_TURNOVER | 0.7 | 0.7 | 0.7 | 0.7 | 0.7 | 0.7 |
| WSX1000 | 550 | 550 | 550 | 550 | 550 | 550 |
| THINPOWER | 2 | 2 | 2 | 2 | 2 | 2 |
| MF | -9999 | -9999 | 0.64 | 0.64 | -9999 | -9999 |
| MR | 0.2 | 0.2 | 0.64 | 0.64 | 0.2 | 0.2 |
| MS | 0.2 | 0.2 | 0.61 | 0.61 | 0.2 | 0.2 |
| DBHDCMAX | 0.69 | 0.62 | 0.18 | 0.16 | 0.34 | 0.28 |
| DBHDCMIN | 0.35 | 0.21 | 0.15 | 0.25 | 0.25 | 0.14 |
| SAP_A | 0.57 | 0.76 | 1.37 | 1.16 | 0.55 | 0.69 |
| SAP_B | 2.25 | 3.04 | 1.35 | 1.57 | 2.05 | 2.13 |
| SAP_LEAF | 2100 | 2100 | 1800 | 2600 | 2600 | 2600 |
| SAP_WRES | 0.11 | 0.11 | 0.05 | 0.05 | 0.05 | 0.05 |
| HMAX | 39.75 | 37.56 | 48.43 | 67.38 | 41.94 | 25.38 |
| DMAX | 80.28 | 92.99 | 157.52 | 151.89 | 83.79 | 114.67 |
| HPOWER | 0.04 | 0.04 | 0.03 | 0.04 | 0.04 | 0.04 |
| RPOWER | 0.15 | 0.15 | 0.21 | 0.21 | 0.15 | 0.15 |
| b_RPOWER | 0 | 0 | 0.71 | 0.71 | 0 | 0 |
| CHPOWER | 0.66 | 0.66 | 1.14 | 1.14 | 0.66 | 0.66 |
| b_CHPOWER | 0 | 0 | 0.8 | 0.8 | 0 | 0 |
| STEMCONST_P | 0.28 | 0.28 | 0.07 | 0.29 | -9999 | -9999 |
| STEMPOWER_P | 2.13 | 2.13 | 2.51 | 2.01 | -9999 | -9999 |
| CRA | 38.26 | 34.26 | 54.92 | 61.75 | 36.64 | 34.23 |
| CRB | 0.05 | 0.03 | 0.02 | 0.04 | 0.05 | 0.04 |
| CRC | 0.95 | 1.22 | 5.85 | 5.63 | 1.15 | 1.07 |
| HDMAX | 1.71 | 1.71 | 1.47 | 0.95 | 1.71 | 1.71 |
| HDMIN | 0.2 | 0.2 | 0.47 | 0.47 | 0.2 | 0.2 |
| DENMAX | 0.01 | 0.01 | 0.4 | 0.4 | 0.8 | 0.8 |
| DENMIN | -9999 | -9999 | 0.01 | 0.01 | 0.01 | 0.01 |
| MINPAREST | 4.06 | 3.36 | 1.76 | 7.44 | 3.5 | 4.05 |
| MINRAIN | 100 | 100 | 100 | 100 | 100 | 100 |
| ADULT_AGE | 5 | 5 | 5 | 5 | 5 | 5 |
| MAXSEED | 20000 | 20000 | 20000 | 20000 | 20000 | 20000 |
| MASTSEED | 5 | 5 | 5 | 5 | 5 | 5 |
| WEIGHTSEED | 7 | 7 | 7 | 7 | 7 | 7 |
| SEXAGE | 30 | 30 | 30 | 30 | 30 | 30 |
| GERMCAPACITY | 0.7 | 0.7 | 0.7 | 0.7 | 0.7 | 0.7 |
| MINTEMP | 20 | 20 | 20 | 20 | 20 | 20 |
| ESTMAX | 0.24 | 0.24 | 0.24 | 0.24 | 0.24 | 0.24 |
| FRACFRUIT | 0.05 | 0.05 | 0.05 | 0.05 | 0.05 | 0.05 |
| ROTATION | 100 | 100 | 100 | 100 | 100 | 100 |
| MINAGEMANAG | 80 | 80 | 80 | 80 | 80 | 80 |
| MINDBHMANAG | 27 | 27 | 27 | 27 | 27 | 27 |
| AV_SHOOT | 10 | 10 | 10 | 10 | 10 | 10 |
| VERY_LABILE | 0.22 | 0.22 | 0.26 | 0.17 | 0.13 | 0.13 |
| LABILE | 0.56 | 0.56 | 0.49 | 0.49 | 0.62 | 0.62 |
| RESISTANT | 0.22 | 0.22 | 0.25 | 0.34 | 0.24 | 0.24 |
